# Supplementary material
Source: PubMed Central journal article supplement (PMC5984619)

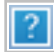

Supplement: NIHMS969381-supplement-Supp-Fig1.pdf [file NIHMS969381-supplement-Supp-Fig1.pdf]



Supplement: NIHMS969381-supplement-Supp-Fig2.pdf [file NIHMS969381-supplement-Supp-Fig2.pdf]



Supplement: NIHMS969381-supplement-Supp-Fig3.pdf [file NIHMS969381-supplement-Supp-Fig3.pdf]
